# Supplementary material
Source: MDPI journal article supplement (https://www.mdpi.com/2073-4344/13/12/1469)
Supplement: s1 [file s1]

## SUPPLEMENTARY INFORMATION

# Enhancement of Sulfur Oxide Capture Capacity by Deposition of Iron Oxide Particles on Graphene Oxide

Tanushree Sankar Sanyal <sup>1,2</sup>, Amanda Ineza Mugisha <sup>1,2</sup>, Andrew Sowinski <sup>1</sup> and Clémence Fauteux-Lefebvre <sup>1,2</sup> \*

<sup>1</sup> Department of Chemical and Biological Engineering, University of Ottawa, 161 Louis-Pasteur, Ottawa ON, K1N 6N5, Canada

<sup>2</sup> Centre for Catalysis Research and Innovation (CCRI), University of Ottawa, 30 Marie-Curie, Ottawa ON, K1N 6N5, Canada

\* Correspondence: cfauteux@uottawa.ca

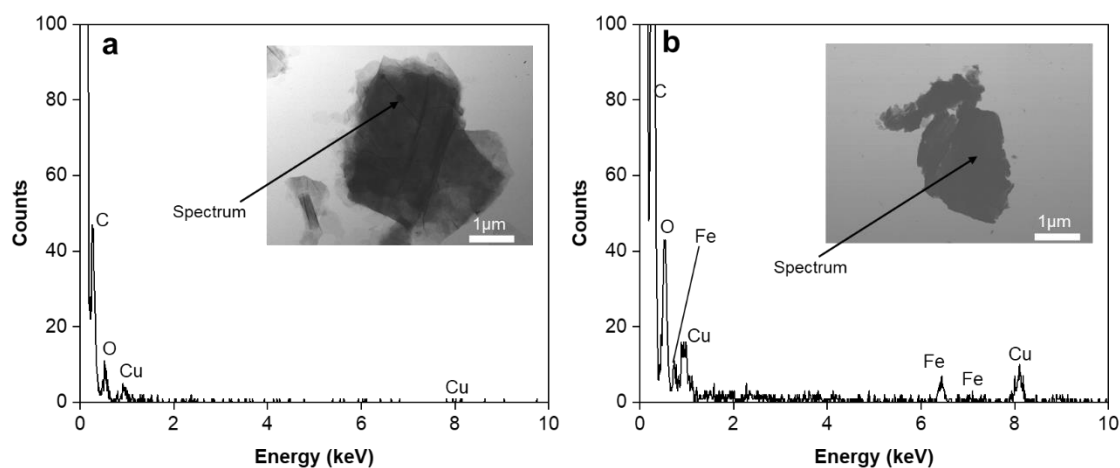

**Figure S1.** EDXS analysis of a. pristine GO and b. synthesized GO-FeO composite.

**Table S1.** Calculated SO<sub>2</sub> capture capacities of GO and GO-FeO.

| Operating conditions           | GO capture capacity<br>(mg <sub>SO2</sub> /g <sub>GO</sub> ) | GO-FeO capture capacity<br>(mg <sub>SO2</sub> /g <sub>GO-FeO</sub> ) |
|--------------------------------|--------------------------------------------------------------|----------------------------------------------------------------------|
| 20 °C and 15 mL/min (240 min)  | 0.233                                                        | 1.079                                                                |
| 60 °C and 10 mL/min (150 min)  | 0.075                                                        | 0.607                                                                |
| 100 °C and 15 mL/min (200 min) | 0.231                                                        | 1.506                                                                |
| 100 °C and 5 mL/min (150 min)  | 0.065                                                        | 0.182                                                                |
